# Supplementary material for: Reprocessable, creep-resistant covalent adaptable networks synthesized using conventional free-radical polymerization conditions with piperidine-based and non-piperidine-based dynamic dialkylamino disulfide chemistry
Source: Royal Society of Chemistry journal article supplement (doi:10.1039/d3py00498h), 2023-01-01
Supplement: d3py00498h1.pdf [file d3py00498h1.pdf]

**Reprocessable, Creep-Resistant Covalent Adaptable Networks  
Synthesized Using Conventional Free-Radical Polymerization Conditions with  
Piperidine-Based and Non-Piperidine-Based Dynamic Dialkylamino Disulfide Chemistry**

Mohammed A. Bin Rusayyis,<sup>a</sup> Logan M. Fenimore,<sup>b†</sup> Nathan S. Purwanto,<sup>a†</sup> and John M. Torkelson<sup>\*,a,b</sup>

<sup>†</sup>These authors contributed equally to this work

<sup>a</sup> Dept. of Materials Science and Engineering, Northwestern University, Evanston, IL 60208, USA

<sup>b</sup> Dept. of Chemical and Biological Engineering, Northwestern University, Evanston, IL 60208, USA

\*Corresponding author. Email address: j-torkelson@northwestern.edu

## **Supporting Information**

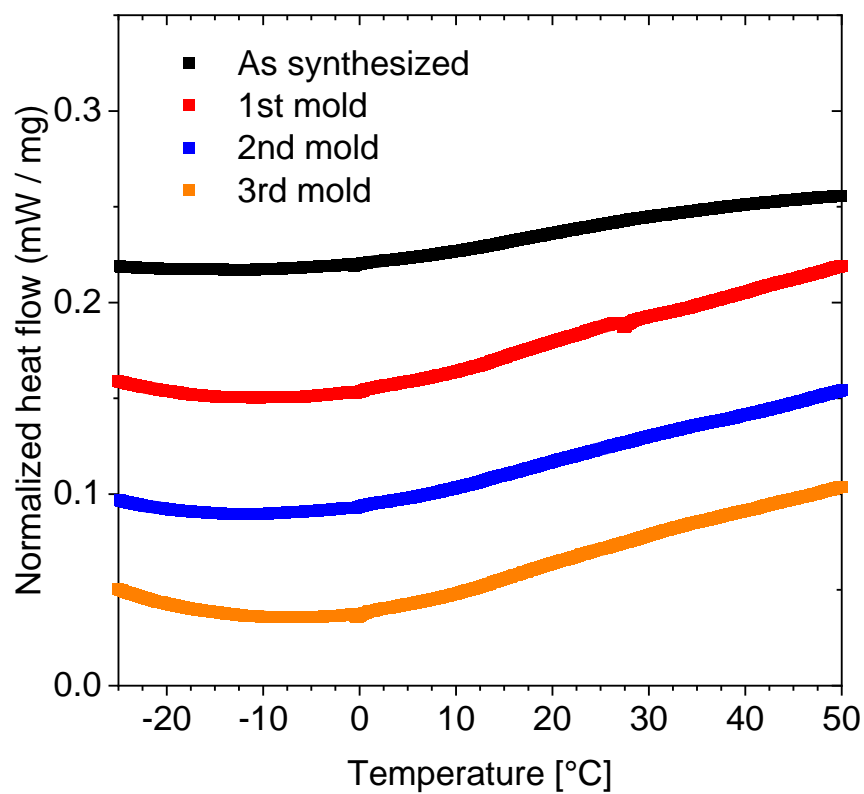

**Figure S1.** DSC curves of as-synthesized and (re)processed PHMA network samples with 5 mol% BiTEMPS methacrylate and 1 mol% AIBN.

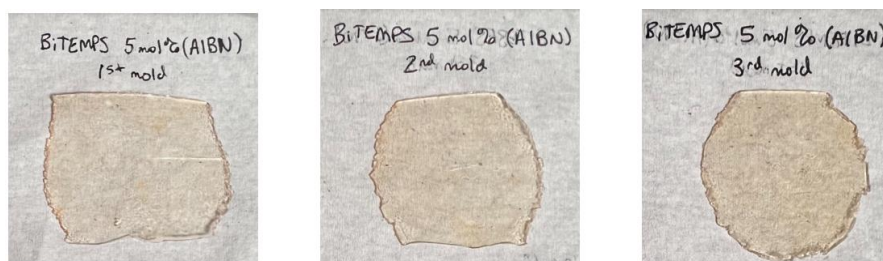

**Figure S2.** Images of molded PHMA networks synthesized with 5 mol% BiTEMPS methacrylate and 1 mol% AIBN.

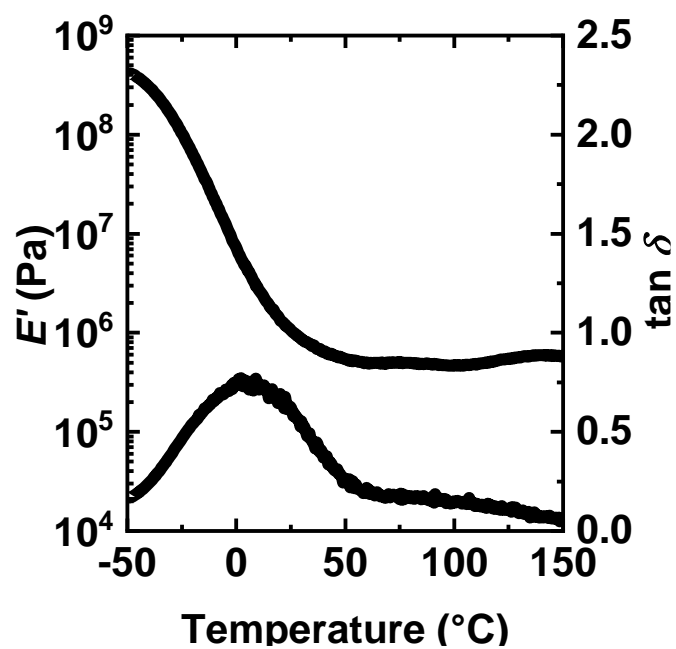

**Figure S3.**  $E'$  and  $\tan \delta$  of 1<sup>st</sup> mold PHMA network synthesized with 5 mol% BiTEMPS methacrylate and 1 mol% BPO.

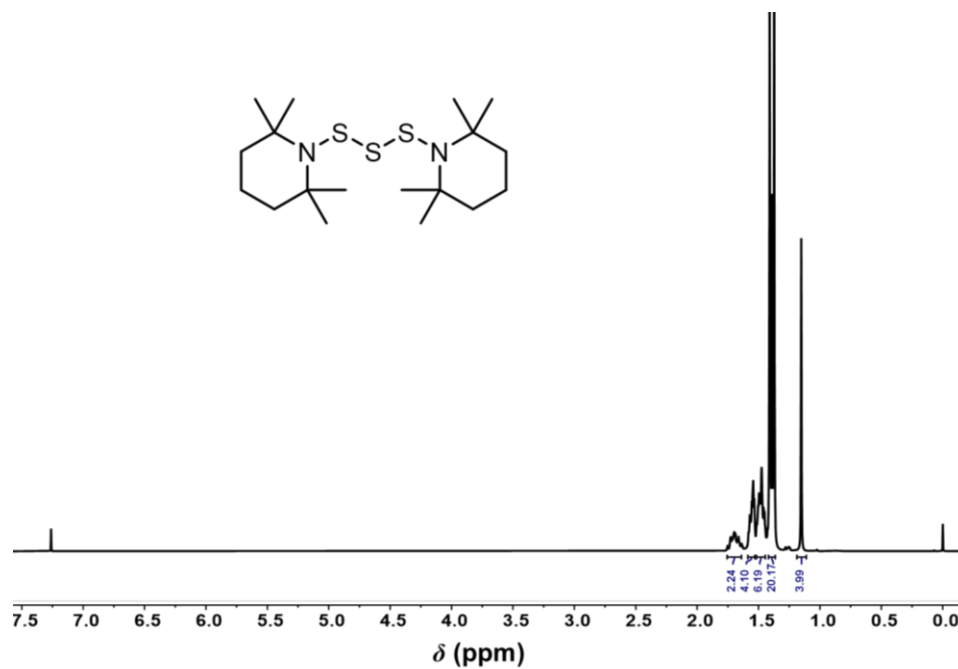

**Figure S4.**  $^1\text{H}$  NMR spectrum of BiTEMPS-SM (500 MHz,  $\text{CDCl}_3$ ).

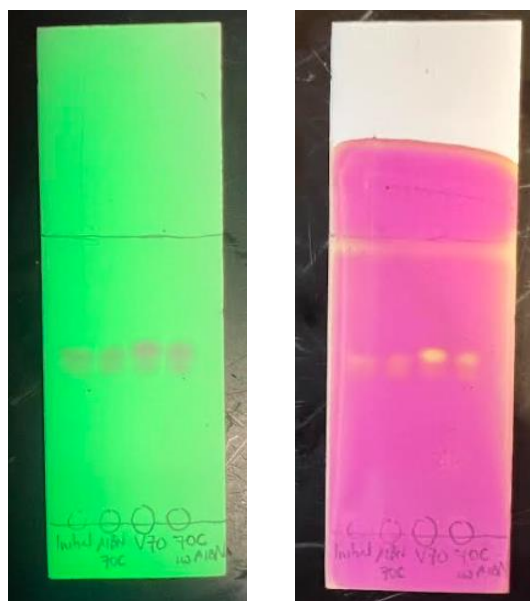

**Figure S5.** Thin-layer chromatography (TLC) plates (left: UV light exposed; right:  $\text{KMnO}_4$  stained) of (spots left to right) BiTEMPS-SM, BiTEMPS-SM with AIBN at 70 °C after 4 h, BiTEMPS-SM with V-70 at 25 °C after 4 h, and BiTEMPS-SM without initiator at 70 °C after 4 h.

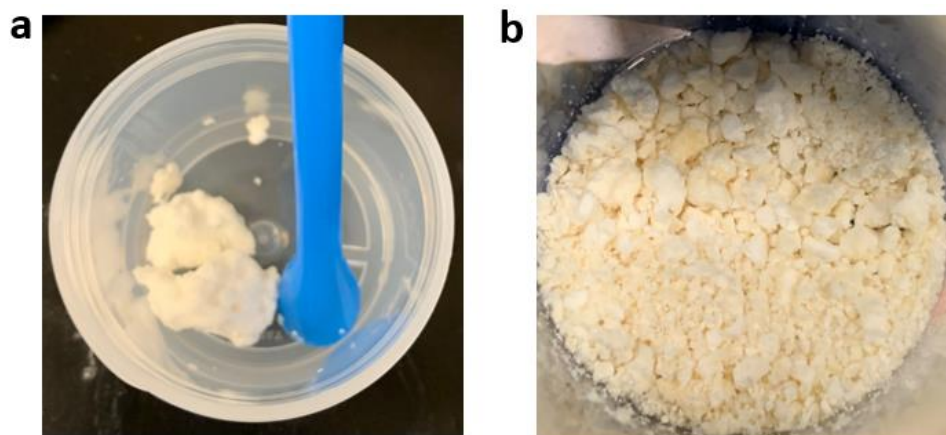

**Figure S6.** Pictures of cross-linker, BiTEBES methacrylate, (a) before and (b) after drying.

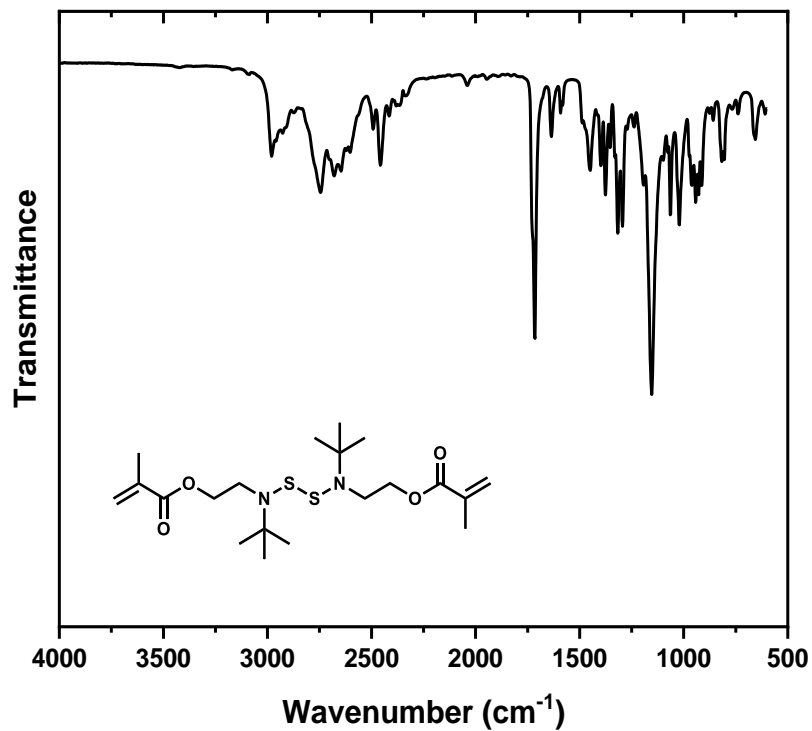

**Figure S7.** FTIR spectrum of BiTEBES methacrylate.

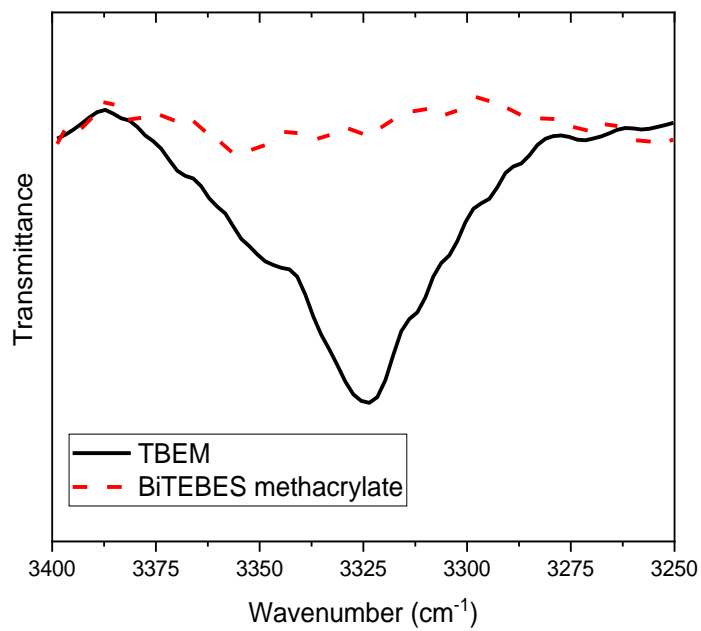

**Figure S8.** FTIR spectrum of TBEM and BiTEBES methacrylate from 3400 to 3250 cm<sup>-1</sup>.

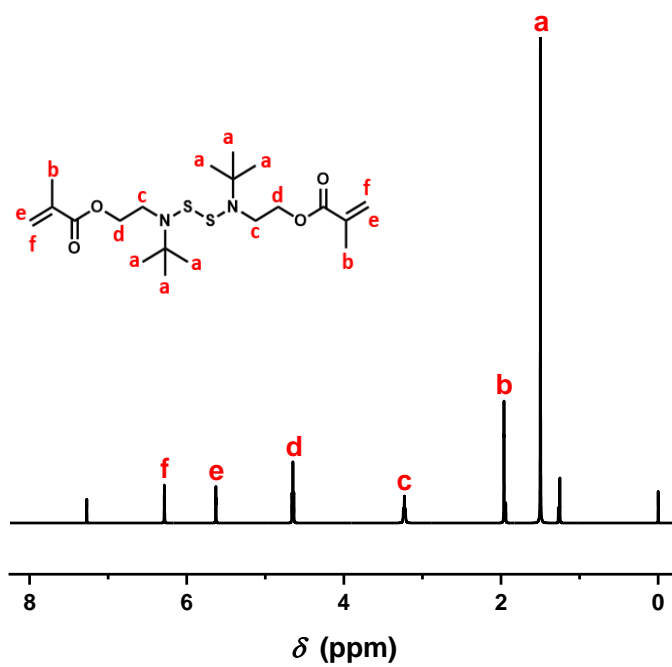

**Figure S9.**  $^1\text{H}$  NMR spectrum of BiTEBES methacrylate (500 MHz,  $\text{CDCl}_3$ ).

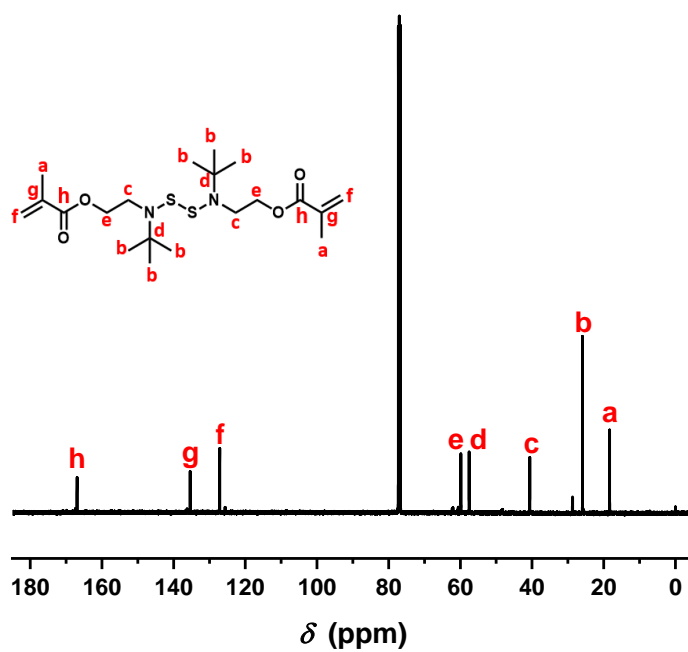

**Figure S10.**  $^{13}\text{C}$  NMR spectrum of BiTEBES methacrylate (126 MHz,  $\text{CDCl}_3$ ).

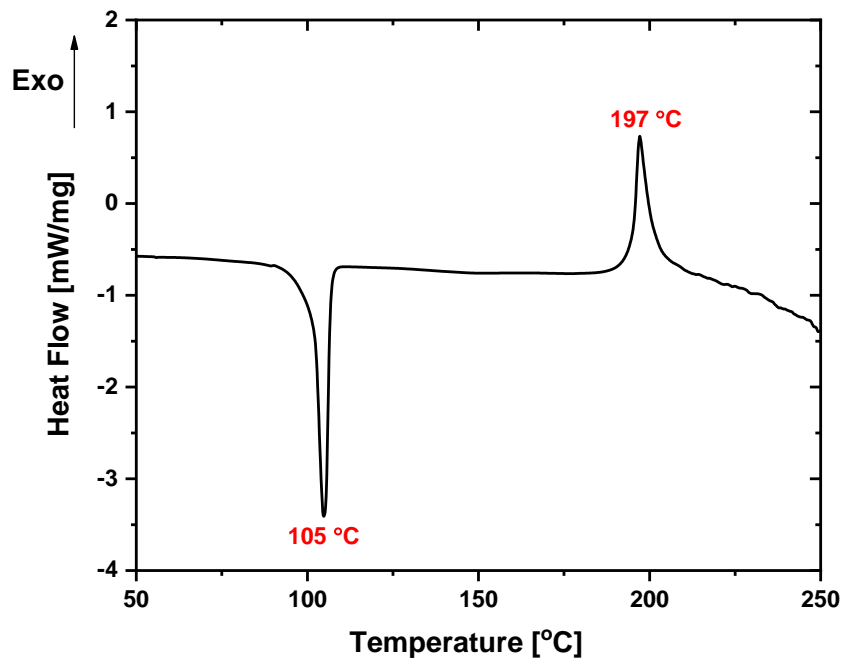

**Figure S11.** DSC thermogram of BiTEBES methacrylate.

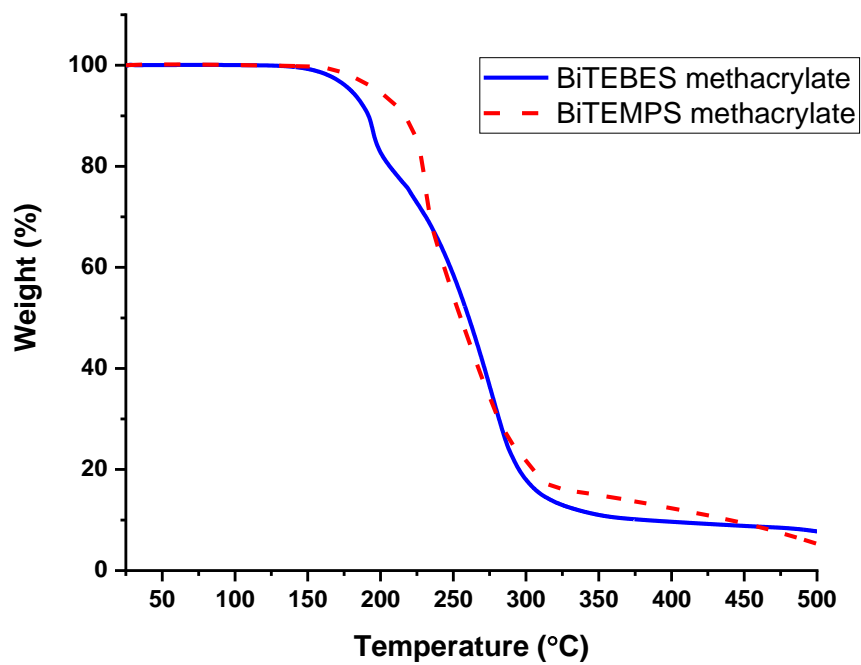

**Figure S12.** TGA curve of BiTEBES methacrylate.

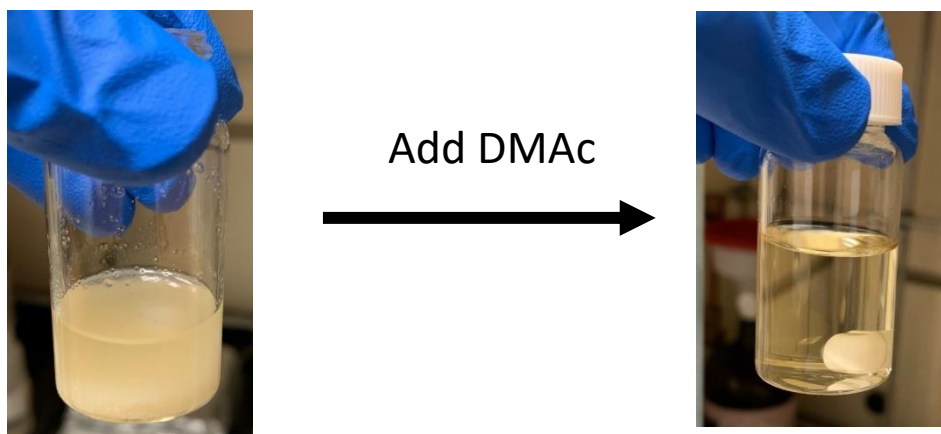

**Figure S13.** Solubility of BiTEBES methacrylate in HMA (a) before and (b) after adding DMAc.

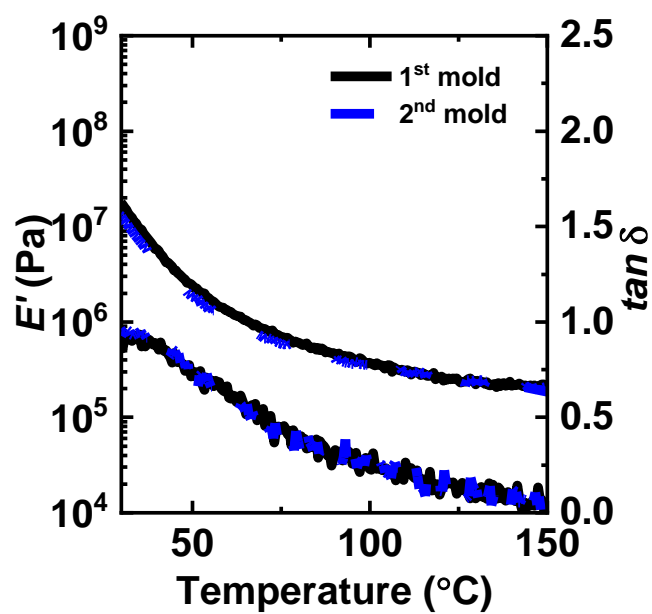

**Figure S14.**  $E'$  and  $\tan \delta$  of PHMA network synthesized with 5 mol% BiTEBES methacrylate and 1 mol% V-70 initiator after one reprocessing step.



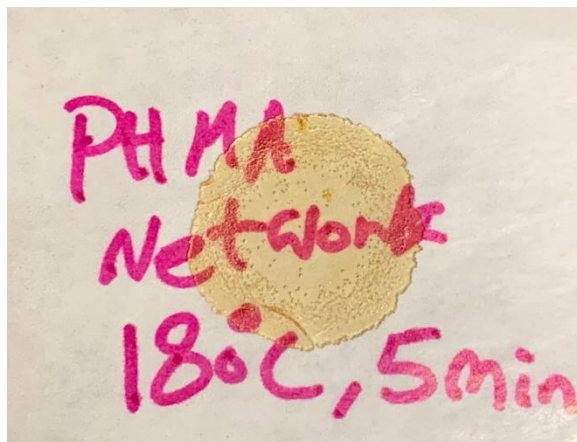

Figure S15. Pictures of 1<sup>st</sup> mold PHMA-5 network sample molded at 180 °C for 5 min.

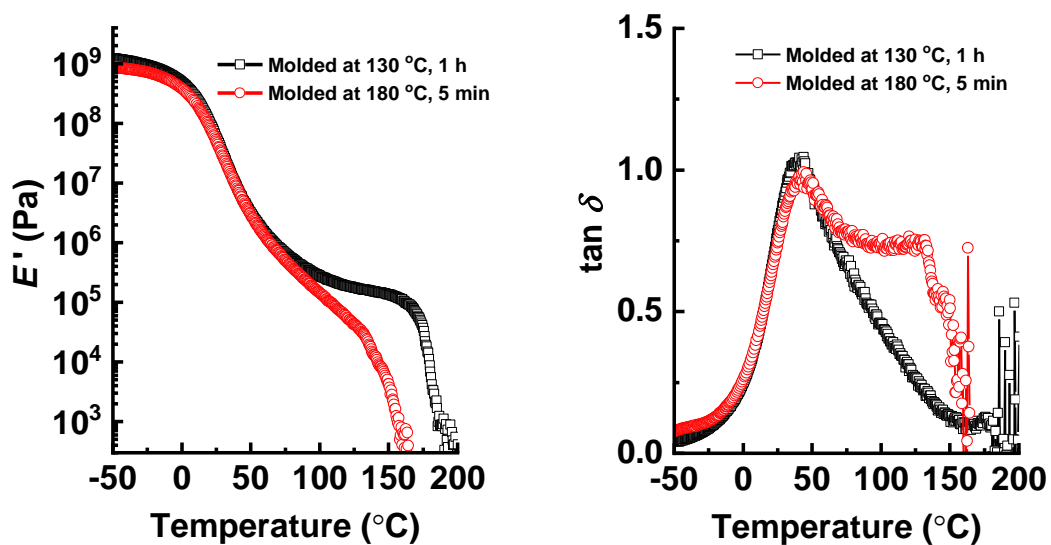

Figure S16. High-temperature DMA response of 1<sup>st</sup> mold PHMA-5 network samples.

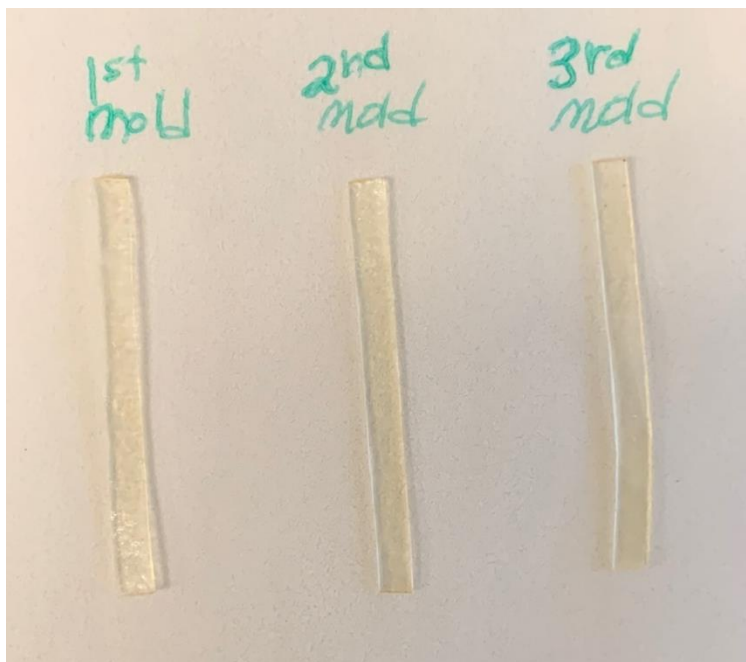

**Figure S17.** Images of molded PHMA networks synthesized with 5 mol% BiTEBES methacrylate and 1 mol% AIBN.

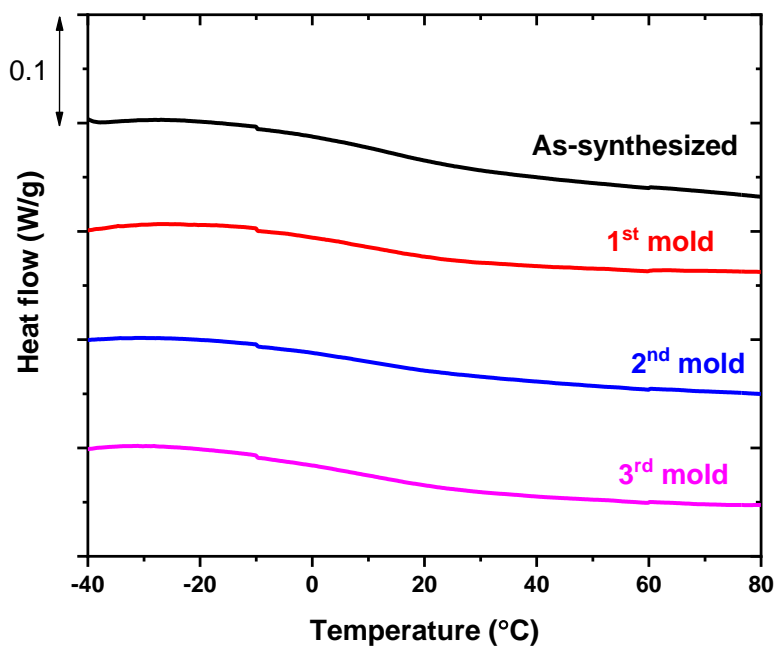

**Figure S18.** Heat flow curves of as-synthesized and molded network samples.

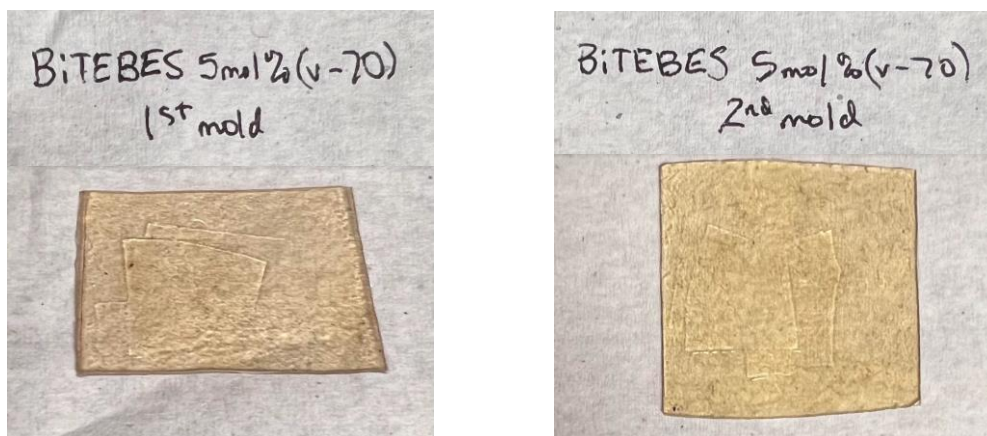

**Figure S19.** Images of molded PHMA networks synthesized with 5 mol% BiTEBES methacrylate and 1 mol% V-70.

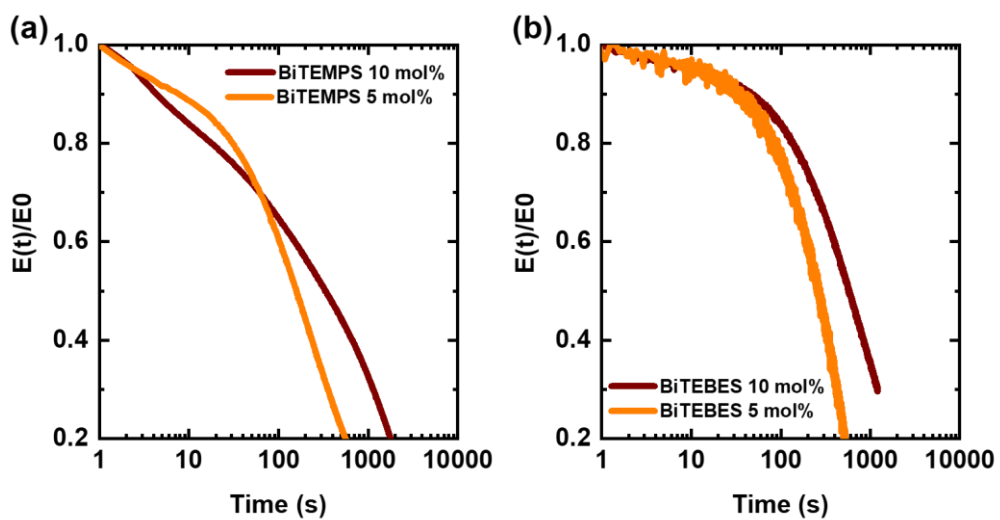

**Figure S20.** Normalized stress relaxation curves of (a) PHMA networks with 5 mol% and 10 mol% BiTEMPS methacrylate with AIBN as initiators, and (b) BiTEBES-based PHMA networks, i.e., PHMA-5 and PHMA-10 at 130 °C.

**Table S1.** Comparison of stress relaxation data at 130 °C for various samples of PHMA networks with different cross-linker identity, loading, and initiators.

| Sample                  | $\tau^*$ | $\beta$ | $\langle\tau\rangle$ | $R^2$ |
|-------------------------|----------|---------|----------------------|-------|
| 5 mol% BiTEMPS w/ AIBN  | 415      | 0.67    | 835                  | 0.999 |
| 5 mol% BiTEMPS w/ v-70  | 650      | 0.75    | 773                  | 0.999 |
| 10 mol% BiTEMPS w/ AIBN | 1080     | 0.46    | 4520                 | 0.989 |
| 5 mol% BiTEBES w/ AIBN  | 355      | 1.00    | --                   | 0.989 |
| 5 mol% BiTEBES w/ v-70  | 563      | 1.00    | --                   | 0.940 |
| 10 mol% BiTEBES w/ AIBN | 948      | 0.77    | 1110                 | 0.999 |

**Table S2.** Gel contents of AIBN-initiated PHMA networks synthesized with 10 mol% BiTEMPS methacrylate.

| Mold                 | Gel Content (%) |
|----------------------|-----------------|
| 1 <sup>st</sup> Mold | 98 ± 1          |
| 2 <sup>nd</sup> Mold | 97 ± 1          |
